# Supplementary material
Source: PubMed Central journal article supplement (PMC3121454)
Supplement: supp_M111.237875_jbc.M111.237875-1.pdf [file supp_M111.237875_jbc.M111.237875-1.pdf]

## SUPPLEMENTAL MATERIAL

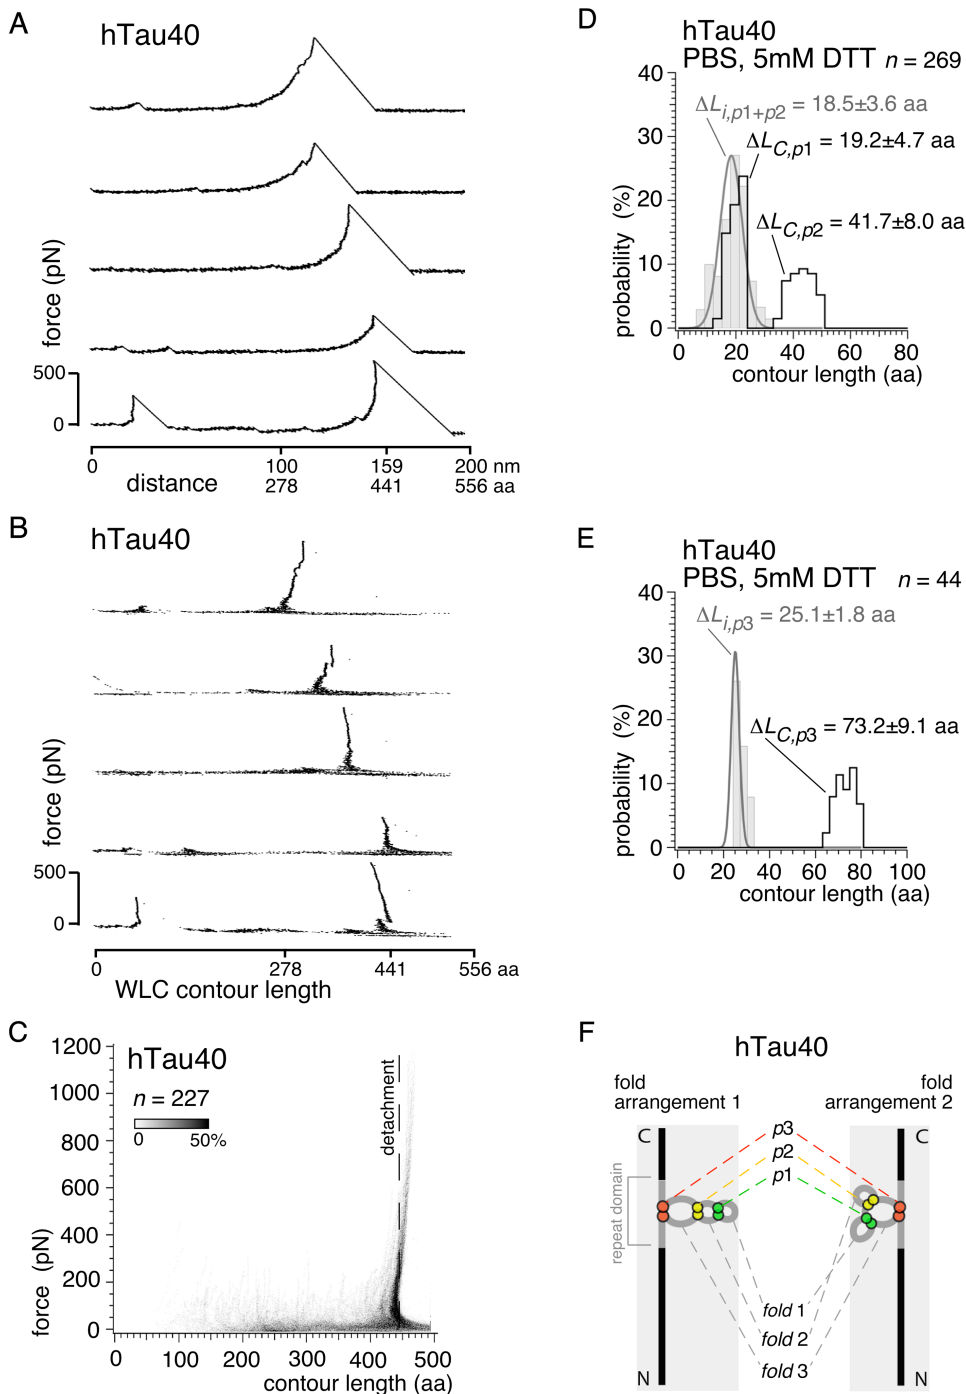

**Supplemental Fig. S1.** SMFS of hTau40. *A*. F-D curves recorded upon stretching single hTau40 molecules in PBS containing 5 mM DTT (same buffer as in Fig. 1E). *B*. Force-contour length (F-LC) curves derived by transforming the F-D curves in (Fig. 1E) using the WLC model (see Materials&Methods). The position of the last force peak in each F-D (Fig. 1E) and F-LC (*A*) curve reflects the detachment of the Tau molecule and assigns the contour length,  $L_C$ , in amino acids of the fully stretched molecule. Force peaks appearing at shorter  $L_C$  resemble interactions that unraveled upon

mechanically stretching of hTau40. *C.* Density plot of superimposed hTau40 F- $L_C$  curves ( $n=227$ ) that have been aligned on their detachment peaks. *D.* The length (most probable $\pm$ SD) of the polypeptide segments,  $\Delta L_i$ , that unraveled when rupturing the interactions at  $\Delta L_C$  of  $19.2\pm 4.7$  aa ( $p1$ ) and  $41.7\pm 8.0$  aa ( $p2$ ) in hTau40 was determined from a Gaussian fit to the combined  $\Delta L_i$  distribution of  $p1$ - and  $p2$ -interactions. *E.* The length of polypeptide segment,  $\Delta L_i$ , embedded in the interaction at  $\Delta L_C$  of  $73.2\pm 9.1$  aa ( $p3$ ) in hTau40 was determined from a Gaussian fit to the distribution as  $\sim 25$  aa. *F.* Cartoon of hTau40 showing two likely arrangements of the folds in the hTau40 repeat domain (grey line) that is flanked by the unstructured termini (black lines). Interactions  $p1$  (green circles),  $p2$  (yellow), and  $p3$  (red) that stabilize *fold1*, *fold2*, and *fold3* are indicated.  $n$ , gives the number of analyzed F-D curves in *A-C* and of interactions in *D* and *E*.

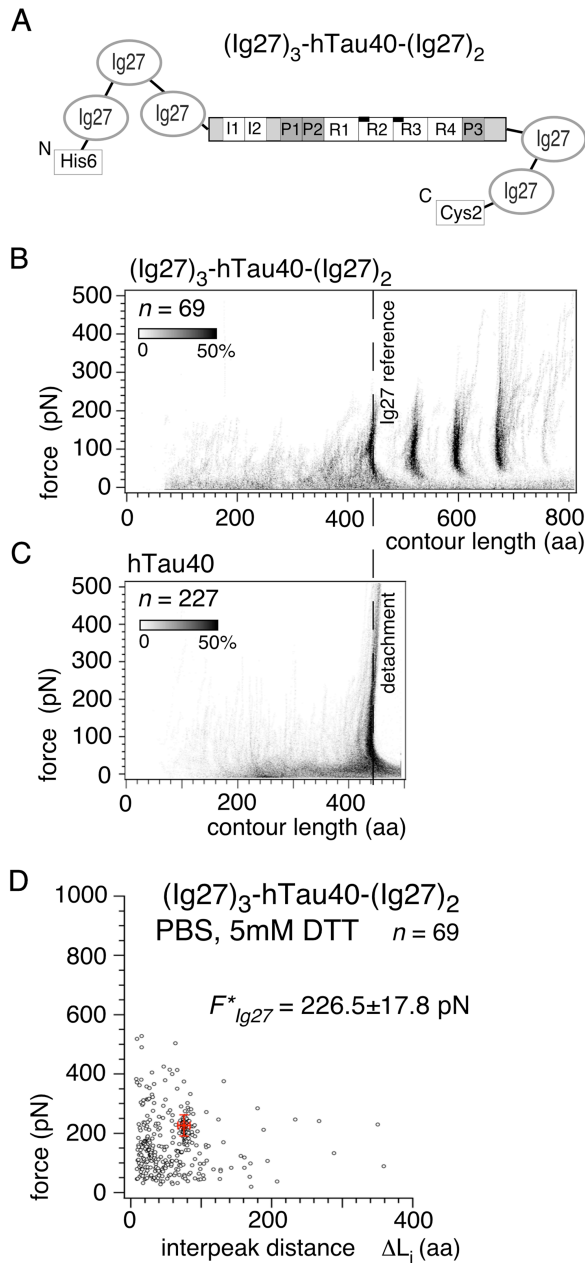

**Supplemental Fig. S2.** SMFS of the  $(\text{Ig27})_3\text{-hTau40-(Ig27)}_2$  construct. *A.* Fusion protein  $(\text{Ig27})_3\text{-hTau40-(Ig27)}_2$  flanking hTau40 by three N-terminal and two C-terminal immunoglobulin 27 (Ig27) domains. Full extension of hTau40 was guaranteed when detecting four or more Ig27 unfolding events in a F-D curve (see Fig. 3B). *B.* Density map of superimposed  $(\text{Ig27})_3\text{-hTau40-(Ig27)}_2$  F- $L_C$  curves ( $n=69$ ) that were aligned on the first force peak denoting the unfolding of Ig27. *C.* Density plot of superimposed hTau40 F- $L_C$  curves ( $n=227$ ) that have been aligned on their detachment peaks. *D.* Rupture forces of the  $(\text{Ig27})_3\text{-hTau40-(Ig27)}_2$  interactions analyzed in *E.* At a pulling velocity of 1000 nm/s, Ig27 has a characteristic rupture force of  $226.5 \pm 17.8$  pN (most probable  $\pm$ SD). The red data point indicates the average contour length of  $77.5 \pm 4.7$  aa and most probable force,  $F^*$  ( $\pm 2$ SD), required to unfold Ig27.  $n$ , gives the number of analyzed F-D curves.

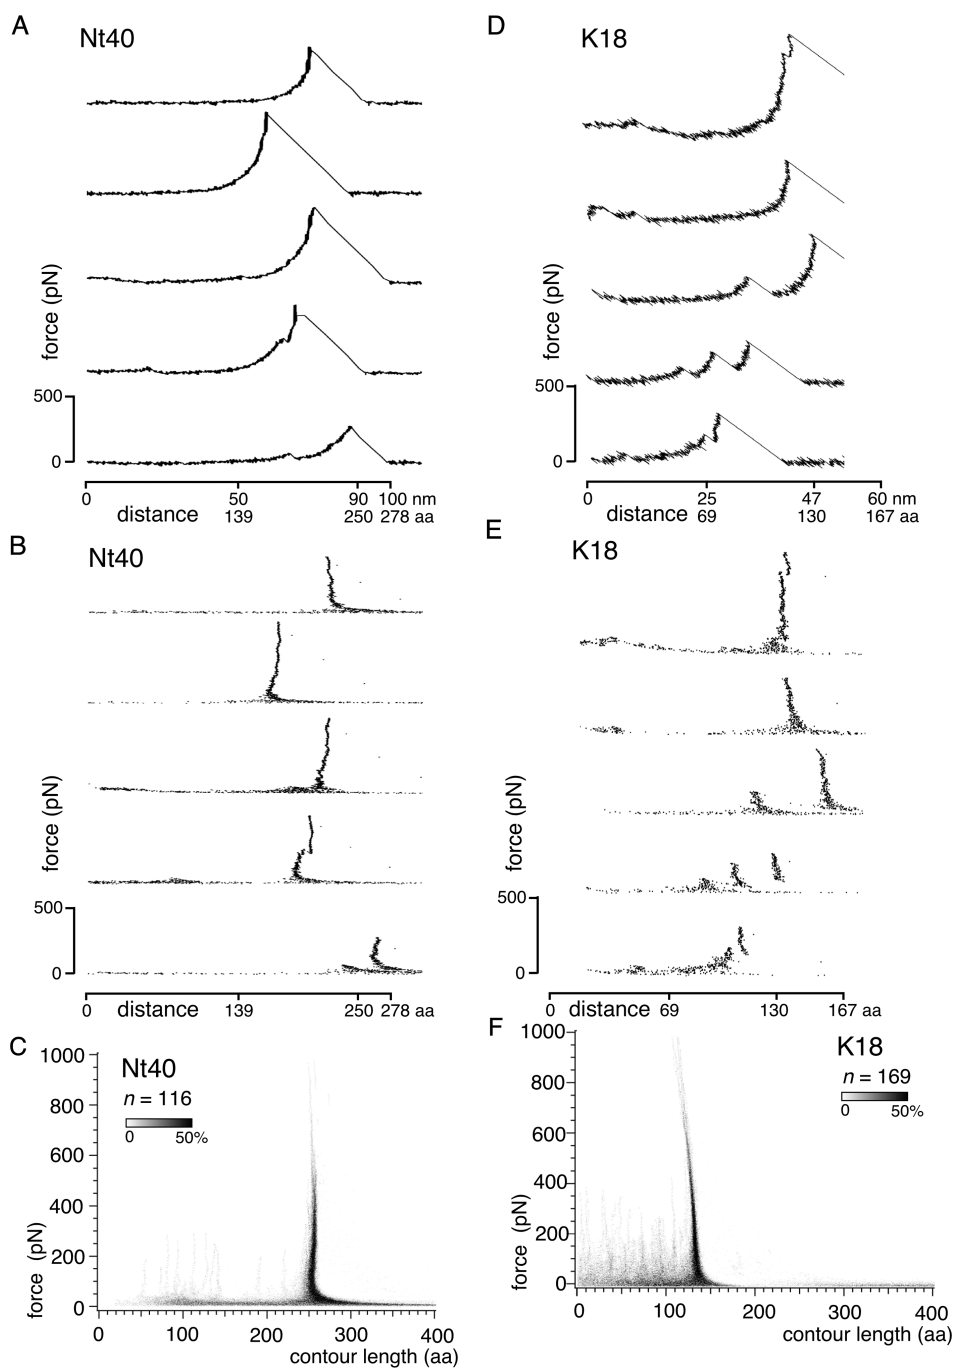

**Supplemental Fig. S3.** SMFS of Nt40, the 254 aa long N-terminal region of hTau40, and K18, the 4R-construct of hTau40. F-D curves recorded upon stretching single Nt40 (A) and K18 (D) molecules in PBS containing 5 mM DTT. F-L<sub>C</sub> curves derived from F-D curves of Nt40 (B) and K18 (E) that are shown in (A) and (D). Density plots of superimposed Nt40 (C;  $n=116$ ) and K18 (F;  $n=169$ ) F-L<sub>C</sub> curves that have been aligned on their detachment peaks.  $n$ , gives the number of analyzed F-D curves.

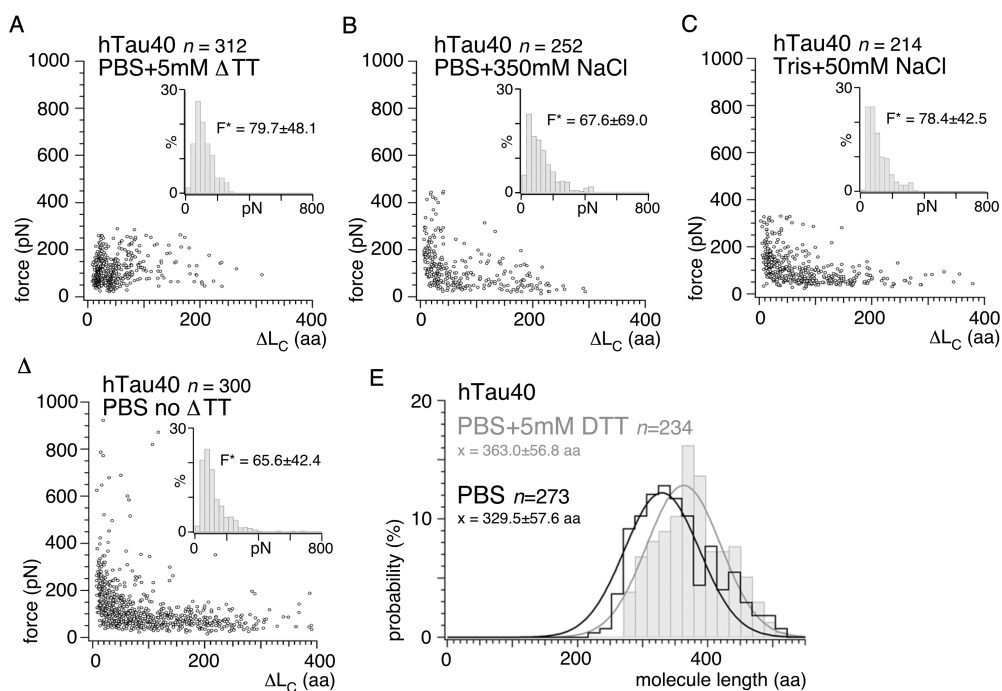

**Supplemental Fig. S4.** Interaction forces recorded upon mechanically stretching hTau40 in PBS, in high and in low ionic strength, and in absence of DTT. Rupture peak forces of hTau40 in (A) PBS containing 5 mM DTT (pulling velocity 875 nm/s), in (B) buffer of  $\sim 500$  mM monovalent electrolyte (PBS + 5mM DTT + 350 mM NaCl; pulling velocity 1000 nm/s), in (C) buffer of  $\sim 50$  mM monovalent electrolyte (10 mM Tris pH 7.4 + 5mM DTT + 50 mM NaCl; pulling velocity 1000 nm/s) and in (D) absence of DTT (pure PBS; pulling velocity 1000 nm/s). Insets show the force distribution and most probable forces ( $\pm$ SD). (E). Most probable contour lengths (aa) of stretched hTau40 molecules were determined from Gaussian fits to the distributions of detachment peak contour lengths detected for hTau40 in PBS containing 5mM DTT (grey) and in pure PBS (black).  $n$ , gives the number of analyzed F-D curves.

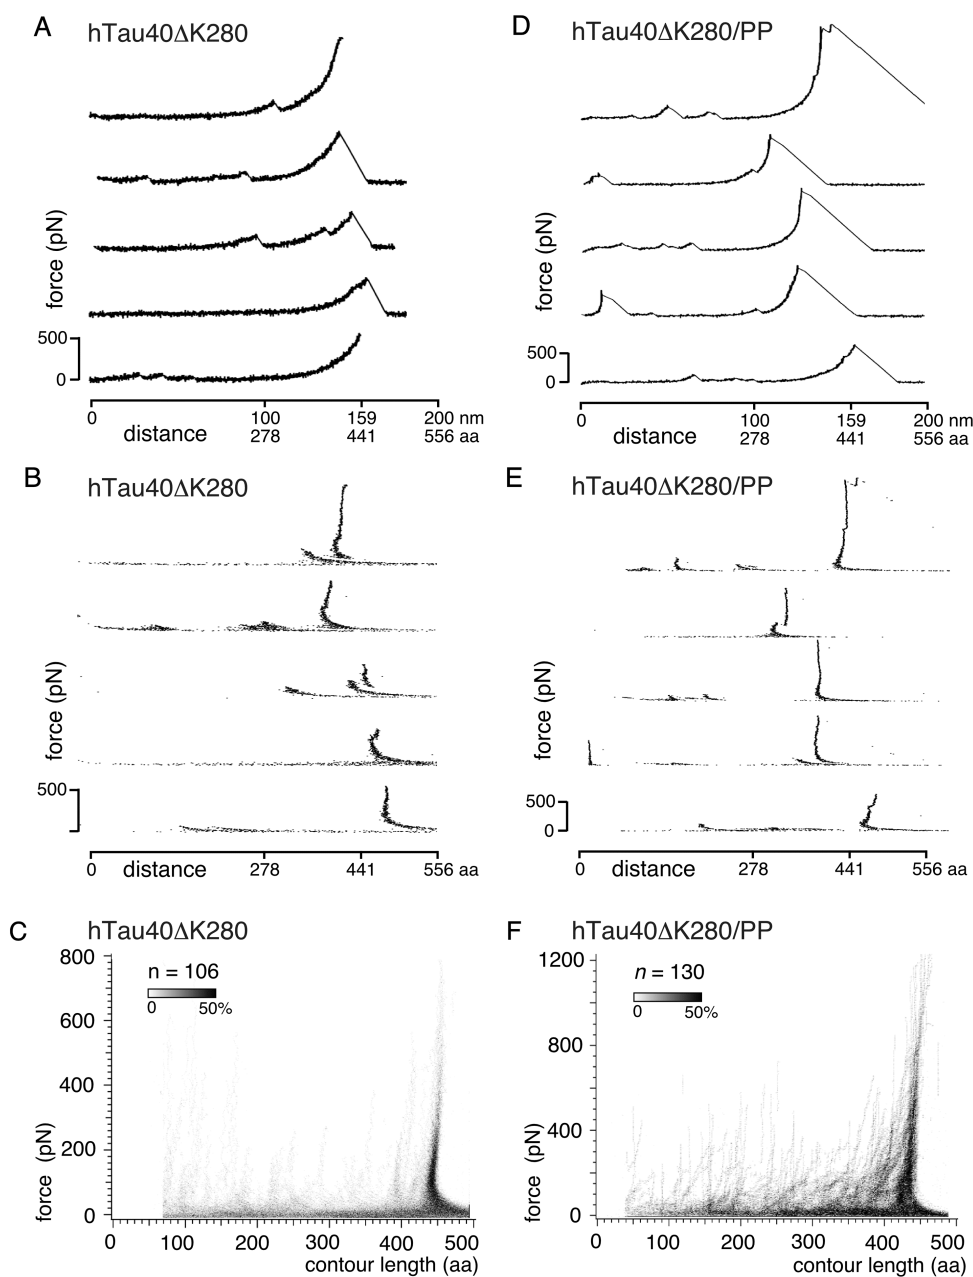

**Supplemental Fig. S5.** F-D curves recorded upon stretching hTau40ΔK280 (A) and hTau40ΔK280/PP (D) molecules in PBS containing 5 mM DTT. F-L<sub>C</sub> curves derived from F-D curves of hTau40ΔK280 (B) and hTau40ΔK280/PP (E) shown in (A) and (D), respectively. Density plots of superimposed hTau40ΔK280 (C;  $n=106$ ) and hTau40ΔK280/PP (F;  $n=130$ ). F-L<sub>C</sub> curves that have been aligned on their detachment peaks.  $n$ , gives the number of analyzed F-D curves.

**Supplemental Table S1.** Contour length distances to the detachment peak,  $\Delta L_C$  (most probable $\pm$ SD), and probabilities of rupture peaks detected in hTau40, K18, Nt40, hTau40 $\Delta$ K280 and hTau40 $\Delta$ K280/PP under the tested conditions (stretched in PBS + 5 mM DTT (\*); pulling speed = 875 nm/s (^); pulling speed =1000 nm/s (v)). For hTau40 $\Delta$ K280/PP, additional force peaks were detected at  $\Delta L_C$  of 101.3 $\pm$ 13.5 nm (p4) and 150.6 $\pm$ 15.0 nm (p5). *n*, gives the number of analyzed F-D curves (molecules).

Interaction contour length distances ( $\Delta L_C$ ; most probable $\pm$ SD) and probabilities in hTau40, hTau40 $\Delta$ K280 and hTau40 $\Delta$ K280/PP, and the constructs K18 and Nt40

|                                          | <i>p1</i>         |    | <i>p2</i>         |    | <i>p3</i>         |    | $\Delta L_C > 100$ aa<br>peaks/molec | total<br>peaks/<br>molec | no<br>peaks<br>% | <i>n</i> |
|------------------------------------------|-------------------|----|-------------------|----|-------------------|----|--------------------------------------|--------------------------|------------------|----------|
|                                          | $\Delta L_C$ (aa) | %  | $\Delta L_C$ (aa) | %  | $\Delta L_C$ (aa) | %  |                                      |                          |                  |          |
| hTau40*^                                 | 19.2 $\pm$ 4.7    | 52 | 41.7 $\pm$ 8.0    | 34 | 73.2 $\pm$ 9.1    | 14 | 0.15                                 | 1.67                     | 32               | 312      |
| K18*v                                    | 19.2 $\pm$ 4.7    | 21 | 41.7 $\pm$ 8.0    | 29 | 73.2 $\pm$ 9.1    | 10 | 0.01                                 | 1.23                     | 21               | 375      |
| Nt40*v                                   | 19.2 $\pm$ 4.7    | 8  | 41.7 $\pm$ 8.0    | 7  | 73.2 $\pm$ 9.1    | 8  | 0.13                                 | 0.63                     | 50               | 452      |
| hTau40*v<br>500mM salt                   | 19.2 $\pm$ 4.7    | 17 | 41.7 $\pm$ 8.0    | 16 | 73.2 $\pm$ 9.1    | 7  | 0.33                                 | 1.16                     | 12               | 250      |
| hTau40*v<br>50mM salt                    | 19.2 $\pm$ 4.7    | 31 | 41.7 $\pm$ 8.0    | 26 | 73.2 $\pm$ 9.1    | 21 | 0.57                                 | 2.10                     | 16               | 204      |
| hTau40*v<br>no DTT                       | 19.2 $\pm$ 4.7    | 29 | 41.7 $\pm$ 8.0    | 32 | 73.2 $\pm$ 9.1    | 22 | 0.96                                 | 2.54                     | 11               | 300      |
| hTau40<br>$\Delta$ K280*^                | 20.3 $\pm$ 6.3    | 48 | 43.3 $\pm$ 8.8    | 26 | 75.9 $\pm$ 12.3   | 10 | 0.14                                 | 1.34                     | 26               | 453      |
| hTau40<br>$\Delta$ K280/PP*o^            | 16.2 $\pm$ 6.7    | 35 | 41.8 $\pm$ 14.9   | 34 | 76.9 $\pm$ 6.7    | 10 | 0.38                                 | 1.40                     | 22               | 434      |
| hTau40*v<br>heparin                      | 19.2 $\pm$ 4.7    | 22 | 41.7 $\pm$ 8.0    | 29 | 73.2 $\pm$ 9.1    | 24 | 1.30                                 | 2.94                     | 14               | 477      |
| hTau40<br>$\Delta$ K280*v<br>+heparin    | 20.3 $\pm$ 6.3    | 21 | 43.3 $\pm$ 8.8    | 25 | 75.9 $\pm$ 12.3   | 27 | 1.87                                 | 3.14                     | 7                | 244      |
| hTau40<br>$\Delta$ K280/PP*v<br>+heparin | 16.2 $\pm$ 6.7    | 27 | 41.8 $\pm$ 14.9   | 40 | 76.9 $\pm$ 6.7    | 9  | 0.92                                 | 2.02                     | 15               | 336      |

**Supplemental Table S2.** Most probable ( $\pm$ SD) interaction rupture forces and probabilities of force peaks detected at  $p1$ ,  $p2$ ,  $p3$  and at  $\Delta L_C > 100$  aa in hTau40, hTau40 $\Delta$ K280 and hTau40 $\Delta$ K280/PP under different buffer conditions (stretched in PBS + 5mM DTT (\*); pulling speed = 875 nm/s ( $\wedge$ ); pulling speed = 1000 nm/s ( $\circ$ )). In presence of 0.33 mM heparin, additional high-force interactions ( $\#$ ) were detected in hTau40 and hTau40 $\Delta$ K280.  $n$ , gives the number of analyzed F-D curves.  $\nu$ , gives the number of detected interactions.

Interaction rupture forces (most probable $\pm$ SD) and probabilities in hTau40, hTau40 $\Delta$ K280 and hTau40 $\Delta$ K280/PP

|                                                | $p1$                                        |       | $p2$                                       |       | $p3$                                      |       | $\Delta L_C > 100$ aa                     |       | $n$ |
|------------------------------------------------|---------------------------------------------|-------|--------------------------------------------|-------|-------------------------------------------|-------|-------------------------------------------|-------|-----|
|                                                | force (pN)                                  | $\nu$ | force (pN)                                 | $\nu$ | force (pN)                                | $\nu$ | force (pN)                                | $\nu$ |     |
| hTau40 $\wedge$                                | 90.8 $\pm$ 39.8                             | 161   | 77.1 $\pm$ 39.2                            | 114   | 129.8 $\pm$ 51.7                          | 43    | 107.6 $\pm$ 47.4                          | 45    | 312 |
| K18 $\circ$                                    | 122.1 $\pm$ 67.6                            | 81    | 92.4 $\pm$ 71.5                            | 111   | 46.5 $\pm$ 34.2                           | 40    | 28.0 $\pm$ 5.8                            | 4     | 375 |
| Nt40 $\circ$                                   | 80.0 $\pm$ 20.3                             | 13    | 53.8 $\pm$ 66.6                            | 16    | 47.0 $\pm$ 32.9                           | 14    | 33.8 $\pm$ 9.9                            | 39    | 452 |
| hTau40 $\circ$<br>500mM salt                   | 124.5 $\pm$ 90.6                            | 41    | 91.5 $\pm$ 60.4                            | 40    | 55.7 $\pm$ 36.4                           | 20    | 51.7 $\pm$ 29.5                           | 81    | 250 |
| hTau40 $\circ$<br>50mM salt                    | 133.0 $\pm$ 51.3                            | 63    | 94.7 $\pm$ 47.1                            | 53    | 71.2 $\pm$ 28.2                           | 42    | 62.3 $\pm$ 22.7                           | 117   | 204 |
| hTau40 $\circ$<br>no DTT                       | 155.6 $\pm$ 84.7                            | 86    | 92.8 $\pm$ 47.6                            | 95    | 76.3 $\pm$ 28.6                           | 65    | 66.4 $\pm$ 29.1                           | 287   | 300 |
| hTau40<br>$\Delta$ K280 $\wedge$               | 129.3 $\pm$ 60.2                            | 217   | 102.2 $\pm$ 48.1                           | 116   | 70.3 $\pm$ 17.7                           | 45    | 74.6 $\pm$ 21.2                           | 64    | 453 |
| hTau40<br>$\Delta$ K280/PP $\wedge$            | 126.3 $\pm$ 48.3                            | 154   | 92.2 $\pm$ 48.7                            | 146   | 86.7 $\pm$ 45.8                           | 41    | 67.7 $\pm$ 29.9                           | 163   | 434 |
| hTau40<br>+heparin $\circ$                     | 165.0 $\pm$ 112.9<br>545.1 $\pm$ 96.1 $\#$  | 107   | 119.9 $\pm$ 85.0<br>504.3 $\pm$ 132.1 $\#$ | 137   | 93.3 $\pm$ 58.4<br>232.7 $\pm$ 31.6 $\#$  | 115   | 59.0 $\pm$ 31.9<br>515.9 $\pm$ 145.5 $\#$ | 621   | 477 |
| hTau40<br>$\Delta$ K280<br>+heparin $\circ$    | 188.2 $\pm$ 123.6<br>438.6 $\pm$ 179.3 $\#$ | 52    | 86.3 $\pm$ 58.7<br>643.7 $\pm$ 223.5 $\#$  | 61    | 94.7 $\pm$ 57.4<br>499.8 $\pm$ 331.0 $\#$ | 68    | 70.0 $\pm$ 40.8<br>448.6 $\pm$ 214.9 $\#$ | 457   | 244 |
| hTau40<br>$\Delta$ K280/PP<br>+heparin $\circ$ | 145.0 $\pm$ 62.1                            | 92    | 91.4 $\pm$ 59.1                            | 135   | 69.5 $\pm$ 47.1                           | 30    | 45.5 $\pm$ 23.4                           | 311   | 336 |



**Combination of force peaks in hTau40, hTau40ΔK280 and hTau40ΔK280/PP.**

The separation between two rupture peaks depends on the length of polypeptide stretch that unfolds upon rupturing the first stabilizing interaction (1). So far we have assumed that the rupture peaks  $\Delta L_C \sim 19$  aa ( $p1$ ),  $\sim 42$  aa ( $p2$ ), and  $\sim 73$  aa ( $p3$ ) resemble independent interactions of Tau. However, these interactions may also be linked to each other. To clarify this issue, we analyzed the combinations in which the peaks occurred (Supplemental Fig. S6).

The probability to detect a single force peak  $p1$  (without a second in  $p2$  or  $p3$ ) was found in  $\sim 35\%$  of hTau40,  $\sim 31\%$  of hTau40ΔK280, and  $\sim 28\%$  of hTau40ΔK280/PP. A combination of rupture peaks at  $p1$  and  $p2$  resembled the unfolding of two equally long  $\sim 19$  aa polypeptide stretches. The probability of this case,  $P_{1+2}$ , is given by the product of the individual probabilities of  $p1$  ( $P_1$ ) and  $p2$  ( $P_2$ ),  $P_{1+2}=P_2*P_1$ . Experimentally, this probability was determined to be  $\sim 13\%$ ,  $\sim 11\%$ , and  $\sim 4\%$  for hTau40, hTau40ΔK280, and hTau40ΔK280/PP, respectively.

Assuming that the two force peaks  $p1$  and  $p2$  occur independent, representing two independent interactions  $iA$  and interactions  $iB$ , the overall probability for peak  $p1$  would be given by a combination of the probabilities for  $iA$  ( $P_{iA}$ ) and  $iB$  ( $P_{iB}$ ) as  $P_1 = (P_{iA}+P_{iB}) - (P_{iA}*P_{iB})$ . The probability to have both independent peaks at  $p1$  and  $p2$  would be  $P_{1+2} = (P_{i1}*P_{i2})$ . This equation system could not be solved for the probabilities  $P_1$  and  $P_{1+2}$  experimentally detected in hTau40 and hTau40ΔK280. From that it appeared that interaction  $iB$  depends on the presence of interaction  $iA$ , or *vice versa*.

Assuming that interaction  $iB$  depends on interaction  $iA$  ( $P_{2B}=P_{1A+2B}/P_{1A}$ ), 37% of hTau40 molecules with interaction  $iA$  in  $p1$  showed a second interaction  $iB$  at  $p2$  (35% of hTau40ΔK280; 15% of hTau40ΔK280/PP). In case of hTau40ΔK280/PP ( $P_1=28\%$  and  $P_{1+2}=4\%$ ), interactions  $iA$  and  $iB$  could be both independent and coupled.

A single force peak at position  $p2$ , reflecting a solitary interaction with a contour length of  $42\pm 6$  aa, was detected in  $\sim 7\%$  of hTau40 and hTau40ΔK280, and in  $\sim 4\%$  of hTau40ΔK280/PP. Combinations of two interactions involving one  $\sim 19$  aa and one  $\sim 42$  aa interaction, namely  $[p2+p3]$  and  $[p1+p3]$ , occurred in only  $\sim 2-4\%$  of the F-D curves.

From this probability analysis it appears that the force peaks  $p1$  and  $p2$  resemble two  $\sim 19$  aa interactions. In case of hTau40 and hTau40ΔK280, establishing the first interaction at  $p1$  favors the second interaction at  $p2$ . The third interaction,  $p3$ , occurs independent of both  $p1$  and  $p2$ . In hTau40ΔK280/PP, this folding hierarchy is disturbed and all three interactions appear independent of each other.

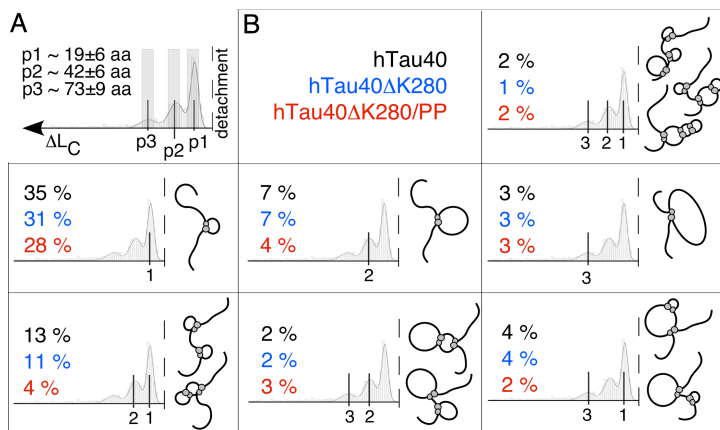

**Supplemental Fig. S6.** Combinations of interactions in hTau40, hTau40ΔK280 and hTau40ΔK280/PP. (A) Schematic assignment of the three frequent force peak positions  $p1$ ,  $p2$ , and  $p3$ . (B) Probabilities (%) of detecting the indicated combination of force peaks  $p1$ ,  $p2$ , and  $p3$  for hTau40 (black), hTau40ΔK280 (blue), and hTau40ΔK280/PP (red). Probabilities and scenarios of other combinations of force peaks are shown.

**Calculation of energy barrier heights and spring constants from DFS data.**

Using DFS, the mechanical stability of molecular bonds is measured by the most probable rupture force,  $F^*$ , and the most probable loading rate,  $r_f^*$ . Both parameters can be used to describe the most prominent energy barrier that has to be overcome in direction of the reaction (pulling) coordinate,  $x$  (Supplemental Fig. S7A). The Bell-Evans theory (2, 3) describes the relation between  $F^*$ ,  $r_f^*$  and  $x_u$  by

$$F^* = \frac{k_B T}{x_u} \ln\left(\frac{x_u r_f^*}{k_B T^* k_0}\right) \quad (\text{Eq. 1})$$

where  $k_B$  is the Boltzmann constant and  $T$  the absolute temperature.  $x_u$  describes the distance from the free energy minimum in the bound state to the free energy maximum at the transition state (Supplemental Fig. S7A).  $k_0$  is the transition (unfolding) rate of crossing the energy barrier at zero applied force.  $r_f^*$  was calculated for each peak in the F-D curves as  $r_f^* = k_{mol}^* v$ , where  $k_{mol}$  is the spring constant of the molecule tethered between stylus and support and  $v$  the pulling velocity. Rupture force and loading rate histograms were fitted to single Gaussian distributions.  $F^*$  was plotted semi-logarithmically against  $r_f^*$ .  $x_u$  and  $k_0$  were estimated from non-linear least-square fits to Eq. 1. This was done for force peaks  $p1$  ( $19 \pm 6$  aa),  $p2$  ( $42 \pm 6$  aa), and  $p3$  ( $73 \pm 9$  aa) in the  $\Delta L_C$  histograms for hTau40, hTau40 $\Delta$ K280 and hTau40 $\Delta$ K280/PP (Supplemental Fig. S7B-J).

The height of an energy barrier is given by the free energy difference,  $\Delta G^\ddagger$ , between bound and transition state (Supplemental Fig. S7A) of a bond.  $\Delta G^\ddagger$  can be assessed using the Arrhenius equation

$$\Delta G^\ddagger = -k_B T \ln(\tau_D k_0) \quad (\text{Eq. 2})$$

where  $\tau_D$  is the diffusive relaxation time ranging from  $10^{-7}$  to  $10^{-9}$  s for proteins (4). We used  $\tau_D = 10^{-8}$  s as a fixed value throughout all calculations of the free energy barrier heights. In case of an error in  $\tau_D$ , we would have generated a systematic error effecting  $\Delta G^\ddagger$  of hTau40, hTau40 $\Delta$ K280 and hTau40 $\Delta$ K280/PP quantitatively but not relative to each other. The actual energy landscape shape of the force barriers is unknown. If assumed to resemble a simple parabolic energy potential, the spring constant of the bond,  $\kappa$ , can be derived from Eq. 3.

$$\kappa = \frac{2\Delta G^\ddagger}{x_u^2} \quad (\text{Eq. 3})$$

Errors in  $k_0$ ,  $x_u$  and  $\Delta G^\ddagger$  were propagated for estimation of errors in  $\Delta G^\ddagger$  and  $\kappa$ .

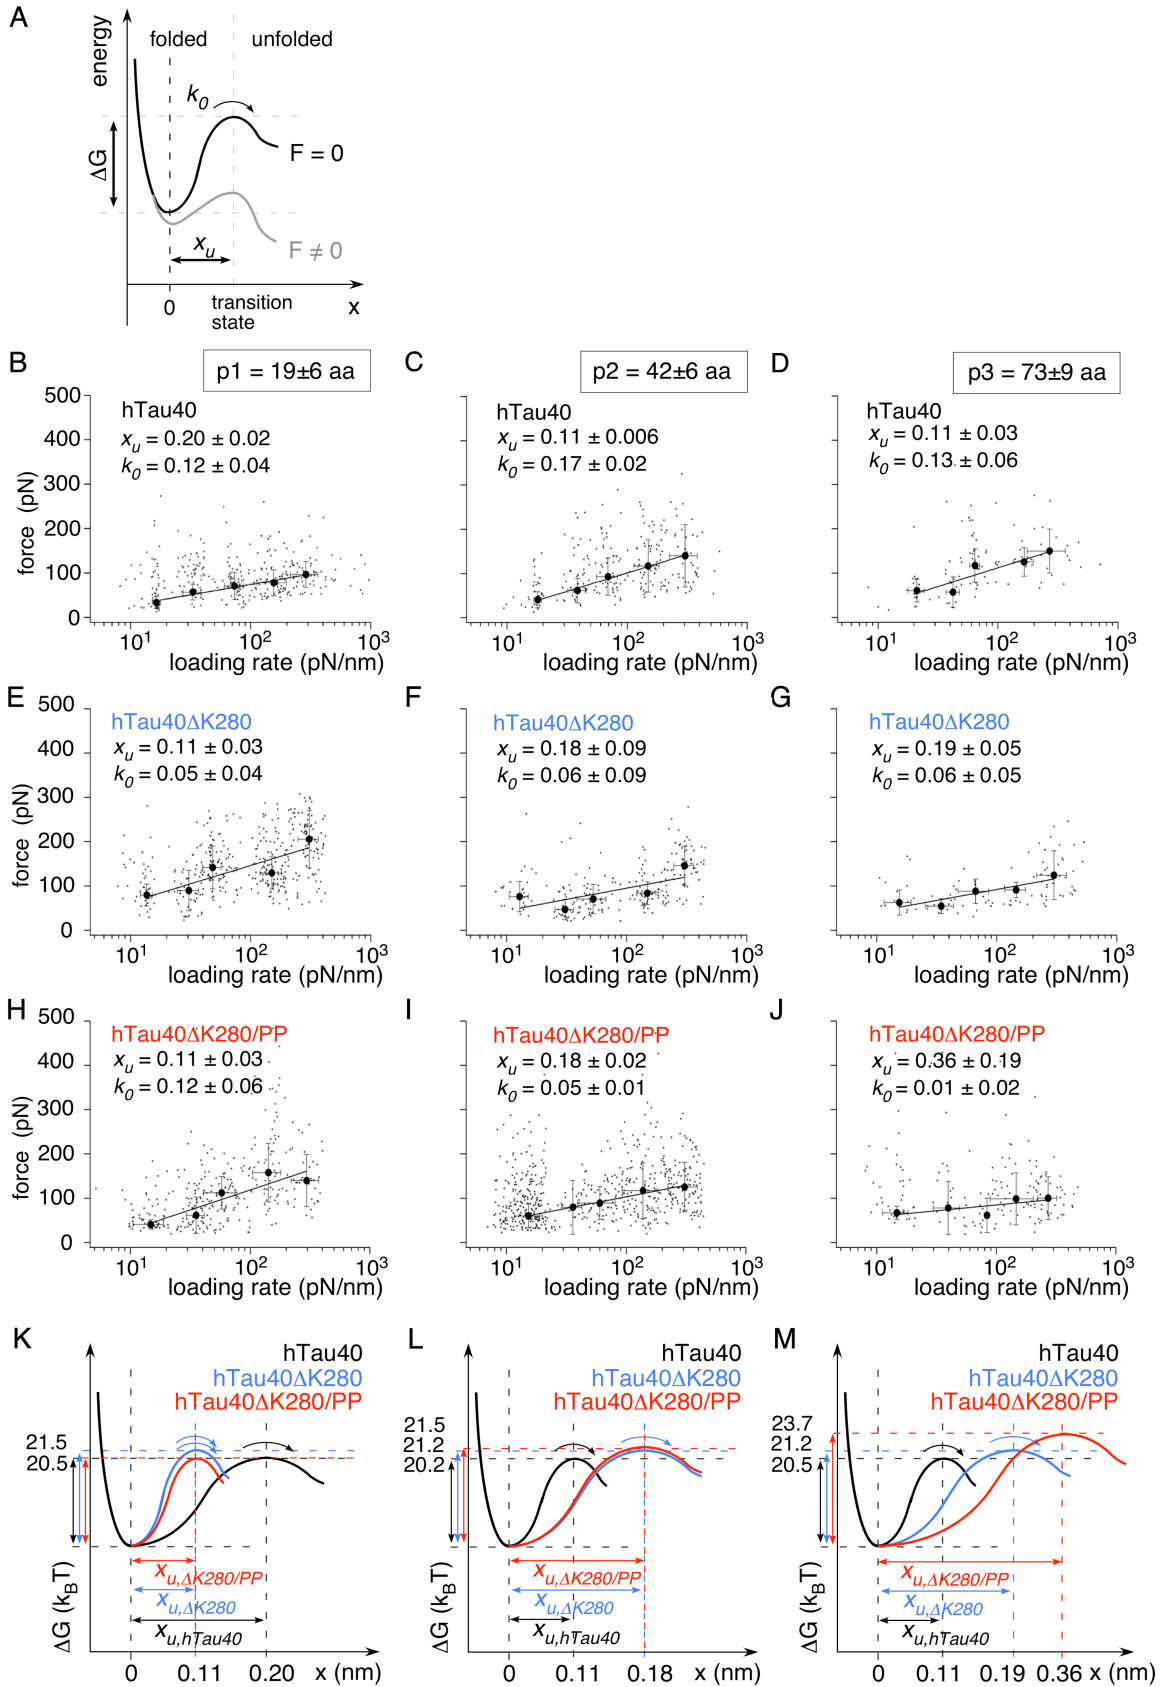

**Supplemental Fig. S7.** DFS of frequent interactions in hTau40, hTau40ΔK280 and hTau40ΔK280/PP. *A.* Schematic free energy landscape for the forced unfolding of a folded structure. In absence of an externally applied force ( $F=0$ ), an unfolding free energy barrier (black curve) is characterized by its height,  $\Delta G^\ddagger$ , the distance separating the folded from the transition state,  $x_u$ , and the unfolding rate in equilibrium,  $k_0$ . When applying an external force ( $F \neq 0$ ), the energy barrier tilts and lowers the free energy barrier (grey curve). As a result the height and the transition rate of the free energy barrier change.  $\Delta G^\ddagger$ ,  $x_u$ , and  $k_0$  can be estimated from dynamic SMFS performed at a broad range of pulling velocities (3). *B-J.* Dynamic force spectroscopy (DFS) spectra ( $F^*$  vs.  $\log(l_r)$ ) of force peaks detected at  $\Delta L_C$  of  $p1=19 \pm 6$  aa (*B,E,H*),  $p2=42 \pm 6$  aa (*C,F,I*), and  $p3=73 \pm 9$  aa (*D,G,J*) for hTau40 and hTau40ΔK280 (pulling velocities: 104, 249, 497, 1249, 2490 nm/s) and hTau40ΔK280/PP (pulling velocities: 104, 256, 497, 1090, and 2490 nm/s). The raw data is plotted as scatter plot in the background of the DFS spectra. *(K-M)* Schematic unfolding energy barriers determined from the DFS spectra (*B-J*) for the interactions at  $p1$  (*K*),  $p2$  (*L*), and  $p3$  (*M*) in hTau40 (black), hTau40ΔK280 (blue), and hTau40ΔK280/PP (red).

**Supplemental Table S3.** Parameters characterizing the unfolding energy barriers (Supplemental Fig. S7A) of force peaks at  $p1=19 \pm 6$  aa,  $p2=42 \pm 6$  aa, and  $p3=73 \pm 9$  aa in hTau40, hTau40ΔK280 and hTau40ΔK280/PP stretched in PBS + 5mM DTT (pulling velocities 104, 249, 497, 1249 and 2490 nm/s ( $\wedge$ ); pulling velocities 104, 256, 497, 1090 and 2490 nm/s ( $\circ$ )). The distance from the folded to the transition state,  $x_u$ , and the native transition rate,  $k_0$ , were derived from fitting (Supplemental material Eq. 1) the DFS spectra (Supplemental. S7B-J). The free energy difference,  $\Delta G^\ddagger$  (Supplemental material Eq. 2), and the interaction spring constant,  $\kappa$  (Supplemental material Eq. 3), of energy barriers were calculated from  $x_u$  and  $k_0$ .

DFS fit values and energy barrier characteristics for interactions in hTau40, hTau40ΔK280 and hTau40ΔK280/PP

|                            | $p1$           |                                 | $p2$           |                                 | $p3$           |                                 |
|----------------------------|----------------|---------------------------------|----------------|---------------------------------|----------------|---------------------------------|
|                            | $x_u$ (nm)     | $k_0$ ( $s^{-1}$ )              | $x_u$ (nm)     | $k_0$ ( $s^{-1}$ )              | $x_u$ (nm)     | $k_0$ ( $s^{-1}$ )              |
| hTau40 $\wedge$            | 0.20±0.02      | 0.12±0.04                       | 0.11±0.01      | 0.17±0.02                       | 0.11±0.04      | 0.13±0.06                       |
| hTau40<br>ΔK280 $\wedge$   | 0.11±0.03      | 0.05±0.04                       | 0.18±0.09      | 0.06±0.09                       | 0.19±0.05      | 0.06±0.05                       |
| hTau40<br>ΔK280/PP $\circ$ | 0.11±0.03      | 0.12±0.06                       | 0.18±0.02      | 0.05±0.01                       | 0.36±0.19      | 0.01±0.02                       |
|                            | $\kappa$ (N/m) | $\Delta G^\ddagger$ ( $k_B T$ ) | $\kappa$ (N/m) | $\Delta G^\ddagger$ ( $k_B T$ ) | $\kappa$ (N/m) | $\Delta G^\ddagger$ ( $k_B T$ ) |
| hTau40 $\wedge$            | 4.2±0.8        | 20.5±0.3                        | 13.7±2.5       | 20.2±0.1                        | 13.9±10.1      | 20.5±0.5                        |
| hTau40<br>ΔK280 $\wedge$   | 14.5±7.9       | 21.4±0.8                        | 5.4±5.4        | 21.2±1.5                        | 4.8±2.6        | 21.2±0.8                        |
| hTau40<br>ΔK280/PP $\circ$ | 13.9±7.6       | 20.5±0.5                        | 5.4±1.2        | 21.4±0.2                        | 1.5±1.5        | 23.0±2.0                        |

## REFERENCES

1. Rief, M., Gautel, M., Oesterhelt, F., Fernandez, J. M. and Gaub, H. E. (1997) *Science* **276**, 1109-1112
2. Bell, G. I. (1978) *Science* **200**, 618-627
3. Evans, E. and Ritchie, K. (1997) *Biophys J* **72**, 1541-1555
4. Krieger, F., Fierz, B., Bieri, O., Drewello, M. and Kiefhaber, T. (2003) *J Mol Biol* **332**, 265-274
